# Supplementary material for: Y-Chromosome Diversity in Modern Bulgarians: New Clues about Their Ancestry
Source: PLoS One. 2013 Mar 6;8(3):e56779. doi: 10.1371/journal.pone.0056779 (PMC3590186; doi:10.1371/journal.pone.0056779)
Supplement: Table S4 — Absolute frequencies of Y-chromosome haplogroups in the 27 populations included in the PCA of figure 3C . (XLSX) [file pone.0056779.s005.xlsx]

## Sheet: Table S4
Table S4 – Absolute frequencies of Y-chromosome haplogroups in the 27 populations included in the PCA of figure 3C.
			Haplogroups
Country/Region (population)	Code	N	C-RPS4Y	DE-YAP x E-SRY4064	E-SRY4064	I-M170	J-M172	L-M20	O-M175	R-M173	R-M124	Reference
Afghanistan/North	Afg-N	44					2	11		22	5	[1]
Afghanistan/South	Afg-S	146	5				9	7		97	4	[1]
Altai Rep./South-East (Kazakh)	SE-Alt	89	54				4		30			[2]
Altai Rep./South-West (Kazakh)	SW-Alt	30	17				1		1	4		[2]
Bulgaria	BUL	808	4		178	215	85	2		224	1	[Present study]
China (Han)	Chi-H	1729	191	43	1	0	4	1	1291	22	4	[3]
China (Manchu)	Chi-M	133	36	1					79		1	[3]
India/Central (Dravidian)	C-Ind-D	50						2	15			[4]
India/East (Austro-Asiatic)	E-Ind-A	64	1				7		34		7	[4]
India/East (Indo-European)	E-ind-I	64	1				4		3	22	12	[4]
India/North (Indo-European)	N-Ind-I	80	2				10	3	1	32	13	[4]
India/Northeast (Tibeto-Burman)	NE-Ind-T	87	1						75	4	5	[4]
India/South (Dravidian)	S-Ind-D	303	6				36	39	33	40	22	[4]
India/West (Indo-European)	W-Ind-I	59	2				9	5		17	9	[4]
Indian/Central (Indo-European)	C-Ind-I	21							6	4		[4]
Iran/North	Irn-N	33	1				8	1	1	8	1	[5]
Iran/South	Irn-S	117			8		27	7		29	1	[5]
Japan	Jap	263	14	103					143			[6]
Korea	Kor	64	8						52			[3]
Kyrgystan	Kyr	13	1						4	8		[7]
Mongolia	Mong	34	15						11	3		[3]
Nepal	Nep	143	8				13		30	51	25	[8]
Nepal (Tharu)	Nep-Th	171	1	6	3		24	4	63	15	8	[9]
Russia/Kazan (Tatar)	Rus-Ta	38			1	7	4	1		10		[10]
Tajikistan	Taj	168	4		6		23	16	1	76	10	[10]
Tibetans	Tib	156	4	79			1		53	3	1	[8]
Turkmenistan	Turkm	30					5			13	1	[10]
Uzbekistan	Uzb	366	42	8	9	8	49	11	18	128	8	[10]
References
1. Lacau H, Gayden T, Regueiro M, Chennakrishnaiah S, Bukhari A, et al. (2012) Afghanistan from a Y-chromosome perspective. Eur J Hum Genet. 20:1063-1070.
2. Dulik MC, Osipova LP, Schurr TG (2011) Y-chromosome variation in Altaian Kazakhs reveals a common paternal gene pool for Kazakhs and the influence of mongolian expansions. PLoS One 6: e17548.
3. Zhong H, Shi H, Qi XB, Duan ZY, Tan PP, et al. (2011) Extended Y chromosome investigation suggests postglacial migrations of modern humans into East Asia via the northern route. Mol Biol Evol 28: 717-727.
4. Sengupta S, Zhivotovsky LA, King R, Mehdi SQ, Edmonds CA, et al. (2006) Polarity and temporality of high-resolution y-chromosome distributions in India identify both indigenous and exogenous expansions and reveal minor genetic influence of Central Asian pastoralists. Am J Hum Genet 78: 202-221.
5. Regueiro M, Cadenas AM, Gayden T, Underhill PA, Herrera RJ (2006) Iran: tricontinental nexus for Y-chromosome driven migration. Hum Hered 61: 132-143.
6. Nonaka I, Minaguchi K, Takezaki N (2007) Y-chromosomal binary haplogroups in the Japanese population and their relationship to 16 Y-STR polymorphisms. Ann Hum Genet 71: 480-495.
7. Karafet T, Xu L, Du R, Wang W, Feng S, et al. (2001) Paternal population history of East Asia: sources, patterns, and microevolutionary processes. Am J Hum Genet 69: 615-628.
8. Gayden T, Cadenas AM, Regueiro M, Singh NB, Zhivotovsky LA, et al. (2007) The Himalayas as a directional barrier to gene flow. Am J Hum Genet 80: 884-894.
9. Fornarino S, Pala M, Battaglia V, Maranta R, Achilli A, et al. (2009) Mitochondrial and Y-chromosome diversity of the Tharus (Nepal): a reservoir of genetic variation. BMC Evol Biol 9: 154.
10. Wells RS, Yuldasheva N, Ruzibakiev R, Underhill PA, Evseeva I, et al. (2001) The Eurasian heartland: a continental perspective on Y-chromosome diversity. Proc Natl Acad Sci U S A 98: 10244-10249.
