# Supplementary material for: Y-Chromosome Diversity in Modern Bulgarians: New Clues about Their Ancestry
Source: PLoS One. 2013 Mar 6;8(3):e56779. doi: 10.1371/journal.pone.0056779 (PMC3590186; doi:10.1371/journal.pone.0056779)
Supplement: Table S7 — Age estimates of microsatellite variation and Standard Error within haplogroups E-V13, I-M423, J-M241, M458, R-L23*, R-U106 and R-U152 in Bulgarians and other Eurasian populations. The number of samples considered is given in parentheses. (XLSX) [file pone.0056779.s008.xlsx]

## Sheet: Table S7
Table S7. Age estimates for haplogroups E-V13, I-M423, J-M241, M458, R-L23*, R-U106 and R-U152 in Bulgarians and other Eurasian populations. The number of samples considered is given in parentheses.
A G E E S T I M A T E S (kya)
Country/Region/Population(1)	Haplogroup
	E-V13	I-M423	J-M241	R-M458	R-L23*	R-U106	R-U152
Ireland						9.4 ± 3 (6)1
England						8.1 ± 3 (23)1	10.6 ± 1 (9)1
Denmark						9 ± 3 (19)1
Sweden
France						5.7 ± 1 (6)1	9.1 ± 2 (14)1
Italy					9.2 ± 2 (14)1	9.1 ± 2 (10)1	8.6 ± 1 (57)1
Italy/Center			4.5 ± 2 (5)2
Italy/Calabria	5.7 ± 3 (6)2
Italy/Apulia	6.8 ± 3 (8)33		9.1 ± 4 (8)3
Switzerland					7.7 ± 2 (10)1	10.0 ± 4 (19)1	8.6 ± 4 (29)1
Germany				10.0 ±3 (15)4		11.1 ±3 (61)1	11.2 ± 2 (33)1
The Netherlands						8.1 ± 3 (28)1
Austria
Czech Republic				8.0 ± 3 (11)3,4
Poland		8.0 ± 3 (14)2		12.0 ± 4 (62)3,4	3.9 ± 1 (7)1	11.1 ± 2 (9)1	10.0 ± 2 (5)1
Hungary	4.9 ± 3 (13)2, 5	5.4 ± 4 (5)2		10.7 ± 4 (25)3,4, 5	9.7 ± 4 (7)1	12.4 ± 4 (6)1
Slovenia		14.5 ± 5 (15)2					10.6 ± 2 (6)1
Bosnia (Bosniac)	3.9 ± 2 (11)2	7.5 ± 2 (36)2		4.7 ± 2 (11)3
Bosnia (Croat and Serb)				1.9 ± 1 (8)3
Bosnia (Croat)	15.1 ± 8 (8)2	8.7 ± 3 (43)2
Bosnia (Serb)	6.2 ± 2 (16)2	10.0 ± 4 (27)2
Croatia	6.5 ± 4 (9)2	7.9 ± 3 (29)2		7.9 ± 2 (8)3,4
Croatia/Osijek		9.0 ± 3 (8)2		7.3 ± 2 (18)3
Albania	5.0 ± 3 (12)2	11.9 ± 4 (8)2	4.0 ± 2 (8)2
FYROM (Albanian)	8.2 ± 3 (22)2	4.9 ± 2 (6)2	2.1 ± 1 (9)2
Bulgaria						15.1 ± 8 (6)3	12.8 ± 4 (6)3
Bulgaria/West	9.3 ± 3 (16)3	8.8 ± 3 (23)3	5.8 ± 3 (7)3	8.5 ± 4 (10)3	6.8 ± 3 (6)3
Bulgaria/Center	6.1 ± 2 (17)3	7.4 ± 3 (16)3	7.8 ± 3 (7)3	4.1 ± 1 (14)3	5.2 ± 3 (7)3
Bulgaria/East	8.4 ± 1 (18)3	7.9 ± 2 (12)3	3.6 ± 2 (5)3	12.4 ± 5 (5)3	16.8 ± 7 (6)3
Greece/Creta				8.6 ± 3 (7)4
Greece/Athens	8.4 ± 3 (15)2	6.4 ± 3 (6)2		6.6 ± 3 (11)3,4	6.9 ± 2 (15)1		7.1 ± 3 (7)1
Greece/Macedonia	9.9 ± 5 (11)2	9.1 ± 2 (10)2		8.3 ± 4 (5)3
Greece			2.7 ± 1 (5)2
Slovakia				10.9 ± 3 (56)4	7.2 ± 3 (10)1	12.0 ± 4 (11)1	9.7 ± 2 (7)1
Romania	4.3 ± 1 (22)5			10.4 ± 4 (7)5	14.3 ± 1 (12)1		7.9 ± 2 (6)1
Estonia				9.4 ± 5 (11)4		14.3 ± 6 (10)1
Ukraine	7.0 ± 2 (11)2,5	12.1 ± 5 (16)2		8.7 ± 3 (21)3,4, 5
Turkey	10.6 ±3 (11)2		9.1 ± 2 (5)2		13.6 ± 2 (58)1
Caucasus				10.4 ± 3 (24)3,4	14.0 ± 3 (32)1
Caucasus/Northeast					13.0 ± 3 (23)1
Caucasus/Northwest					14.0 ± 4 (6)1
Iraq					14.0 ± 2 (12)6
Iran					11.5 ± 2 (58)7
Pakistan					14.5 ± 4 (5)1
India and Nepal			20.1 ± 6 (10)8
Russia (Karelian)				3.0 ± 1 (12)4
Russia (Vepsa)				3.4 ± 1 (6)4
Russia				10.1 ± 3 (12)4
Russia (Bashkir)					2.0 ± 1 (29)1		0 ± 0 (8)1
Total	7.4 ± 2 (255)	9.1 ± 3 (274)	8.2 ± 2 (90)	10.4 ± 3 (384)	11.9 ± 1 (293)	11.0 ± 3 (234)	9.2 ± 1 (212)
(1) For better comparisons, popolations are listed following a geographical criterion.
References
1. Myres NM, Rootsi S, Lin AA, Järve M, King RJ, et al. (2011) A major Y-chromosome haplogroup R1b Holocene era founder effect in Central and Western Europe. Eur J Hum Genet 19: 95-101.
2. Battaglia V, Fornarino S, Al-Zahery N, Olivieri A, Pala M, et al. (2009) Y-chromosomal evidence of the cultural diffusion of agriculture in Southeast Europe. Eur J Hum Genet 17: 820-830.
3. Present study.
4. Underhill PA, Myres NM, Rootsi S, Metspalu M, Zhivotovsky LA, et al. (2010) Separating the post-Glacial coancestry of European and Asian Y chromosomes within haplogroup R1a. Eur J Hum Genet 18: 479-484.
5. Martinez-Cruz B, Ioana M, Calafell F, Arauna LR, Sanz P, et al. (2012) Y-Chromosome analysis in individuals bearing the Basarab name of the first dynasty of Wallachian kings. PLoS One 7: e41803.
6. Al-Zahery N, personal communication.
7. Grugni V, personal communication.
8. Fornarino S, Pala M, Battaglia V, Maranta R, Achilli A, et al. (2009) Mitochondrial and Y-chromosome diversity of the Tharus (Nepal): a reservoir of genetic variation. BMC Evol Biol 9: 154.
